# Supplementary material for: Spatial expression of IKK-alpha is associated with a differential mutational landscape and survival in primary colorectal cancer
Source: PubMed Central journal article supplement (PMC9174220; doi:10.1038/s41416-022-01729-2), 2022-02-16

## Supplementary Tables and Figures

Supplementary Table 2. 151 cancer-associated gene panel

|        |         |        |        |         |         |       |
|--------|---------|--------|--------|---------|---------|-------|
| ABCB1  | CSF1R   | FGFR4  | KMT2A  | PHF6    | SLC22A1 | ZMYM3 |
| ABCC2  | CTNNB1  | FLT1   | KRAS   | PIK3CA  | SLC22A2 |       |
| ABL1   | CYP19A1 | FLT3   | LAMA2  | PIK3R1  | SLC31A1 |       |
| ABL2   | CYP2A6  | FLT4   | LCK    | PSMB1   | SLC34A2 |       |
| AKT1   | CYP2B6  | FSTL5  | LTK    | PSMB2   | SLC45A3 |       |
| AKT2   | CYP2C19 | GNA11  | MAP2K1 | PSMB5   | SLCO1B1 |       |
| AKT3   | CYP2C9  | GNAQ   | MAP2K2 | PSMD1   | SMAD4   |       |
| ALK    | CYP2D6  | GNAS   | MAP2K4 | PSMD2   | SMARCA4 |       |
| APC    | DDR1    | GSTP1  | MAP3K1 | PTCH1   | SMARCB1 |       |
| ASXL1  | DDR2    | H3F3A  | MAPK1  | PTEN    | SMO     |       |
| ATM    | DDX3X   | HNF1A  | MED13  | PTPN11  | SNCAIP  |       |
| ATRX   | DNMT3A  | HRAS   | MET    | RAF1    | SOS1    |       |
| BRAF   | DPYD    | IDH1   | MLH1   | RARA    | SPRED1  |       |
| BRCA1  | EGFR    | IDH2   | MPL    | RARB    | SRC     |       |
| BRCA2  | ERBB2   | IKZF1  | MST1R  | RARG    | STK11   |       |
| CBL    | ERBB3   | IL2RA  | MTOR   | RB1     | SUFU    |       |
| CDA    | ERBB4   | IL2RB  | MYC    | RET     | TAS2R38 |       |
| CDH1   | ERG     | IL2RG  | MYD88  | ROS1    | TET2    |       |
| CDKN2A | ESR1    | INPP4B | NELL2  | RPS6KB1 | TP53    |       |
| CDKN2B | ESR2    | JAK1   | NF1    | RUNX1   | TRRAP   |       |
| CEBPA  | EZH2    | JAK2   | NOTCH1 | RXRA    | TYK2    |       |
| CHD7   | FBXW7   | JAK3   | NPM1   | RXRB    | UGT1A1  |       |
| CHIC2  | FGFR1   | KDM6A  | NRAS   | RXRG    | VHL     |       |
| CREBBP | FGFR2   | KDR    | PDGFRA | SHH     | WT1     |       |
| CRLF2  | FGFR3   | KIT    | PDGFRB | SHOC2   | YES1    |       |

## Supplementary Table 3. Supplementary Code

```
R version 4.0.2 (2020-06-22) -- "Taking Off Again"
Copyright (C) 2020 The R Foundation for Statistical Computing
Platform: x86_64-apple-darwin17.0 (64-bit)

R is free software and comes with ABSOLUTELY NO WARRANTY.
You are welcome to redistribute it under certain conditions.
Type 'license()' or 'licence()' for distribution details.

Natural language support but running in an English locale

R is a collaborative project with many contributors.
Type 'contributors()' for more information and
'citation()' on how to cite R or R packages in publications.

Type 'demo()' for some demos, 'help()' for on-line help, or
'help.start()' for an HTML browser interface to help.
Type 'q()' to quit R.

[R.app GUI 1.72 (7847) x86_64-apple-darwin17.0]

[Workspace restored from /Users/meerapatel/.RData]
[History restored from /Users/meerapatel/.Rapp.history]

> install.packages("maxstat")
--- Please select a CRAN mirror for use in this session ---
trying URL 'https://cran.ma.imperial.ac.uk/bin/macosx/contrib/4.0/maxstat_0.7-25.tgz'
Content type 'application/x-gzip' length 180958 bytes (176 KB)
=====
downloaded 176 KB

The downloaded binary packages are in
  /var/folders/s4/vgt0mphis693dd3ztkl4kcfh80000gn/T//Rtmp7z01jt/downloaded_packages
> install.packages("survival")
trying URL 'https://cran.ma.imperial.ac.uk/bin/macosx/contrib/4.0/survival_3.2-11.tgz'
Content type 'application/x-gzip' length 6803373 bytes (6.5 MB)
=====
downloaded 6.5 MB

The downloaded binary packages are in
  /var/folders/s4/vgt0mphis693dd3ztkl4kcfh80000gn/T//Rtmp7z01jt/downloaded_packages
> install.packages("survminer")
trying URL 'https://cran.ma.imperial.ac.uk/bin/macosx/contrib/4.0/survminer_0.4.9.tgz'
Content type 'application/x-gzip' length 3227677 bytes (3.1 MB)
=====
downloaded 3.1 MB

The downloaded binary packages are in
  /var/folders/s4/vgt0mphis693dd3ztkl4kcfh80000gn/T//Rtmp7z01jt/downloaded_packages
> install.packages("tidyverse")
trying URL 'https://cran.ma.imperial.ac.uk/bin/macosx/contrib/4.0/tidyverse_1.3.1.tgz'
Content type 'application/x-gzip' length 421035 bytes (411 KB)
=====
downloaded 411 KB
```

The downloaded binary packages are in

/var/folders/s4/vgt0mphs693dd3ztkl4kcfh80000gn/T//Rtmp7z01jt/downloaded\_packages

```
> library(maxstat)
> library(survival)
> library(survminer)
Loading required package: ggplot2
Loading required package: ggpubr
> library(tidyverse)
— Attaching packages
```

— tidyverse 1.3.1 —

```
✓ tibble 3.1.2 ✓ dplyr 1.0.7
✓ tidyr 1.1.3 ✓ stringr 1.4.0
✓ readr 1.4.0 ✓ forcats 0.5.1
✓ purrr 0.3.4
— Conflicts
```

— tidyverse\_conflicts() —

```
✖ dplyr::filter() masks stats::filter()
✖ dplyr::lag() masks stats::lag()
> mydata<-read.csv(file.choose())
> res.cut <- surv_cutpoint(mydata, time="CSS", event="acd", variables = c("cyt"))
> summary(res.cut)
  cutpoint statistic
cyt 111.25 1.350276
>
> plot(res.cut,"cyt")
```

```
> library(maftools)
> IKKlow <- read.maf(file.choose())
-Reading
-Validating
--Removed 115 duplicated variants
--Non MAF specific values in Variant_Classification column:
Multi_Hit
3UTR
inframe_indelstop_gained
inframe_indel
inframe_indelMissense_Mutation
--Non MAF specific values in Variant_Type column:
Complex
-Silent variants: 338
-Summarizing
-Processing clinical data
--Missing clinical data
-Finished in 13.5s elapsed (0.769s cpu)
> IKKhigh <- read.maf(file.choose())
-Reading
-Validating
--Removed 27 duplicated variants
--Non MAF specific values in Variant_Classification column:
Multi_Hit
inframe_indelMissense_Mutation
3UTR
--Non MAF specific values in Variant_Type column:
Complex
-Silent variants: 97
-Summarizing
-Processing clinical data
--Missing clinical data
-Finished in 13.2s elapsed (0.465s cpu)
```

```

> oncoplot(maf=IKKlow,top=10)
> oncoplot(maf=IKKhigh,top=10)
> OncogenicPathways(maf= IKKlow)
  Pathway N n_affected_genes fraction_affected Mutated_samples Fraction_mutated_samples
1: Hippo 38      1  0.02631579      9      0.07086614
2: MYC 13      1  0.07692308      2      0.01574803
3: NRF2 3      1  0.33333333      3      0.02362205
4: TGF-Beta 7      2  0.28571429     33      0.25984252
5: TP53 6      3  0.50000000     95      0.74803150
6: WNT 68      4  0.05882353     110     0.86614173
7: NOTCH 71      7  0.09859155     57      0.44881890
8: Cell_Cycle 15      8  0.53333333     14      0.11023622
9: PI3K 29     11  0.37931034     55      0.43307087
10: RTK-RAS 85     26  0.30588235    111     0.87401575
> OncogenicPathways(maf= IKKhigh)
  Pathway N n_affected_genes fraction_affected Mutated_samples Fraction_mutated_samples
1: MYC 13      1  0.07692308      1      0.03333333
2: NRF2 3      1  0.33333333      1      0.03333333
3: Hippo 38     2  0.05263158      3      0.10000000
4: TGF-Beta 7      2  0.28571429      8      0.26666667
5: WNT 68      4  0.05882353     26      0.86666667
6: TP53 6      4  0.66666667     25      0.83333333
7: Cell_Cycle 15     6  0.40000000      7      0.23333333
8: NOTCH 71      7  0.09859155     17      0.56666667
9: PI3K 29      7  0.24137931     12      0.40000000
10: RTK-RAS 85     22  0.25882353     24      0.80000000
> IKKlow.vs.IKKhigh <- mafCompare(m1 = IKKlow, m2 = IKKhigh, m1Name = 'Low', m2Name = 'High', minMut = 5)
> print(IKKlow.vs.IKKhigh)
$results
  Hugo_Symbol Low High  pval  or  ci.up  ci.low  adjPval
1: ASTE1 8 7 0.01001805 0.2238304 0.8012648 0.06359222 0.4921700
2: SLC23A2 6 6 0.01200415 0.2012461 0.8214793 0.04908922 0.4921700
3: POLE 7 5 0.05385437 0.2947028 1.2768974 0.07343308 0.7519427
4: TTK 12 7 0.05674470 0.3457914 1.1527239 0.11070825 0.7519427
5: BRCA2 13 7 0.06792041 0.3775869 1.2442178 0.12308978 0.7519427
6: B2M 5 4 0.06844821 0.2694396 1.4533705 0.05383565 0.7519427
7: PDGFRA 5 4 0.06844821 0.2694396 1.4533705 0.05383565 0.7519427
8: PTEN 14 0 0.07336026 Inf Inf 0.81936105 0.7519427
9: SMARCA4 6 4 0.09872874 0.3253476 1.6812828 0.07119608 0.8723136
10: AR 30 12 0.10637970 0.4664463 1.1897593 0.18707918 0.8723136
11: EP300 8 5 0.13154671 0.3391165 1.4311206 0.08882791 0.9133470
12: TGFB2 15 7 0.13983790 0.4427883 1.4320047 0.14859127 0.9133470
13: BLM 9 5 0.14570957 0.3842868 1.5876531 0.10455842 0.9133470
14: CREBBP 10 5 0.16625170 0.4301706 1.7467397 0.12067300 0.9133470
15: PBRM1 5 3 0.17910296 0.3718493 2.5384351 0.06752637 0.9133470
16: ARID1A 21 8 0.20046269 0.5471584 1.6169482 0.19929906 0.9133470
17: GATA3 9 0 0.20860635 Inf Inf 0.47031025 0.9133470
18: DICER1 10 0 0.21047644 Inf Inf 0.53763774 0.9133470
19: PTCH1 7 4 0.22327762 0.3821234 1.9125568 0.08914869 0.9133470
20: KRAS 64 11 0.22358246 1.7484577 4.4203978 0.72223406 0.9133470
21: ALK 15 6 0.24106449 0.5381326 1.8704627 0.17395952 0.9133470
22: TM6SF1 8 4 0.24524246 0.4397898 2.1474817 0.10767815 0.9133470
23: RPL22 17 7 0.25618270 0.5103057 1.6264330 0.17504174 0.9133470
24: ERBB3 9 4 0.27465524 0.4983789 2.3859382 0.12660822 0.9384054
25: RET 7 0 0.34778915 Inf Inf 0.33941406 1.0000000
26: ATRX 6 3 0.37458847 0.4490883 2.9473353 0.08898161 1.0000000
27: CIITA 6 3 0.37458847 0.4490883 2.9473353 0.08898161 1.0000000
28: ASXL1 17 6 0.39089864 0.6202814 2.1261121 0.20487592 1.0000000
29: FBXW7 17 6 0.39089864 0.6202814 2.1261121 0.20487592 1.0000000
30: MAP3K1 7 3 0.40433587 0.5275093 3.3623781 0.11122247 1.0000000
31: SETD2 7 3 0.40433587 0.5275093 3.3623781 0.11122247 1.0000000

```

```

32: SMO 7 3 0.40433587 0.5275093 3.3623781 0.11122247 1.0000000
33: MTOR 8 3 0.44087494 0.6072447 3.7844407 0.13407620 1.0000000
34: TAF1B 8 3 0.44087494 0.6072447 3.7844407 0.13407620 1.0000000
35: PALB2 11 1 0.46455162 2.7368742 122.3349771 0.36954367 1.0000000
36: ERBB4 12 4 0.51041225 0.6801031 3.1255163 0.18595751 1.0000000
37: NOTCH2 12 4 0.51041225 0.6801031 3.1255163 0.18595751 1.0000000
38: NOTCH4 15 5 0.54214769 0.6715161 2.5836987 0.20622828 1.0000000
39: RAF1 5 0 0.58406150 Inf Inf 0.21393275 1.0000000
40: RNF43 20 6 0.58862733 0.7491340 2.5274659 0.25342227 1.0000000
41: CCDC150 5 2 0.61928362 0.5761261 6.3445321 0.08857889 1.0000000
42: CHEK2 5 2 0.61928362 0.5761261 6.3445321 0.08857889 1.0000000
43: ERBB2 5 2 0.61928362 0.5761261 6.3445321 0.08857889 1.0000000
44: FGFR4 5 2 0.61928362 0.5761261 6.3445321 0.08857889 1.0000000
45: MEN1 5 2 0.61928362 0.5761261 6.3445321 0.08857889 1.0000000
46: RUNX1 6 2 0.64901575 0.6959969 7.4060780 0.11627587 1.0000000
47: TP53 77 20 0.67685460 0.7712589 1.8986671 0.29639510 1.0000000
48: IDH1 7 2 0.68199414 0.8177800 8.4846651 0.14482613 1.0000000
49: CDK12 9 1 0.68844020 2.2028937 100.2063382 0.28480076 1.0000000
50: SF3B1 9 1 0.68844020 2.2028937 100.2063382 0.28480076 1.0000000
51: GNAS 9 3 0.70102725 0.6882524 4.2132295 0.15745888 1.0000000
52: NF1 9 3 0.70102725 0.6882524 4.2132295 0.15745888 1.0000000
53: AIM2 10 3 0.71489808 0.7706056 4.6490741 0.18137706 1.0000000
54: BRCA1 10 3 0.71489808 0.7706056 4.6490741 0.18137706 1.0000000
55: AMER1 11 3 0.73205699 0.8543215 5.0923870 0.20574190 1.0000000
56: RAD50 11 3 0.73205699 0.8543215 5.0923870 0.20574190 1.0000000
57: BRAF 21 4 0.78724197 1.2857464 5.5934097 0.38553581 1.0000000
58: PIK3CA 26 5 0.80052555 1.2851146 4.7152825 0.42508788 1.0000000
59: APC 88 21 1.00000000 0.9672364 2.4501684 0.35636385 1.0000000
60: CTNNB1 10 2 1.00000000 1.1952751 11.8250345 0.23477173 1.0000000
61: NOTCH3 15 3 1.00000000 1.2039815 6.9451405 0.30803454 1.0000000
62: NRAS 10 2 1.00000000 1.1952751 11.8250345 0.23477173 1.0000000
63: ARID1B 8 2 1.00000000 0.9415386 9.5797972 0.17414891 1.0000000
64: ARID2 9 2 1.00000000 1.0673368 10.6929960 0.20416172 1.0000000
65: ATM 21 5 1.00000000 0.9906258 3.6914454 0.32001574 1.0000000
66: ATR 17 4 1.00000000 1.0045168 4.4470226 0.29273495 1.0000000
67: COBLL1 8 1 1.00000000 1.9427024 89.4194012 0.24365629 1.0000000
68: CTCF 7 1 1.00000000 1.6867822 78.8112904 0.20337251 1.0000000
69: GNA11 5 1 1.00000000 1.1872805 58.1277446 0.12575888 1.0000000
70: IDH2 5 1 1.00000000 1.1872805 58.1277446 0.12575888 1.0000000
71: JAK1 5 1 1.00000000 1.1872805 58.1277446 0.12575888 1.0000000
72: KMT2A 12 2 1.00000000 1.4576530 14.1494673 0.29780844 1.0000000
73: MSH2 19 4 1.00000000 1.1425671 5.0096955 0.33828153 1.0000000
74: MSH6 14 3 1.00000000 1.1142903 6.4694426 0.28173609 1.0000000
75: NBN 5 1 1.00000000 1.1872805 58.1277446 0.12575888 1.0000000
76: NOTCH1 18 4 1.00000000 1.0729175 4.7257866 0.31529577 1.0000000
77: PIK3R1 8 1 1.00000000 1.9427024 89.4194012 0.24365629 1.0000000
78: POLQ 11 2 1.00000000 1.3253537 12.9772713 0.26602150 1.0000000
79: ROS1 8 2 1.00000000 0.9415386 9.5797972 0.17414891 1.0000000
80: SMAD4 18 4 1.00000000 1.0729175 4.7257866 0.31529577 1.0000000
81: TEAD2 9 2 1.00000000 1.0673368 10.6929960 0.20416172 1.0000000
82: TSC2 8 2 1.00000000 0.9415386 9.5797972 0.17414891 1.0000000

```

```
Hugo_Symbol Low High pval or ci.up ci.low adjPval
```

```
##SampleSummary
```

```
Cohort SampleSize
```

```
1: Low 127
```

```
2: High 30
```

```
> forestPlot(mafCompareRes = IKKlow.vs.IKKhigh, pVal = 0.05, color = c('royalblue', 'maroon'), geneFontSize = 0.8)
```

```
> genes = c("ASTE1", "SLC23A2", "POLE", "TTK", "BRCA2", "B2M", "PDGFRA", "PTEN", "SMARCA4", "AR")
```

```
> coBarplot(m1 = IKKlow, m2 = IKKhigh, m1Name = 'Low', m2Name = 'High', genes = genes)
```

```

> IKKall <- read.maf(file.choose())
-Reading
-Validating
--Removed 199 duplicated variants
--Non MAF specific values in Variant_Classification column:
Multi_Hit
3UTR
inframe_indellstop_gained
inframe_indel
inframe_indelMissense_Mutation

--Non MAF specific values in Variant_Type column:
Complex
-Silent variants: 613
-Summarizing
-Processing clinical data
--Missing clinical data
-Finished in 3.460s elapsed (0.270s cpu)
> lollipopPlot(maf = IKKall, gene = 'AR', AACol = "VAF")
2 transcripts available. Use arguments refSeqID or proteinID to manually specify tx name.
  HGNC  refseq.ID  protein.ID aa.length
1:  AR  NM_000044  NP_000035   920
2:  AR  NM_001011645  NP_001011645   388
Using longer transcript NM_000044 for now.

> IKKpunctatelow <- read.maf(file.choose())
-Reading
-Validating
Error in validateMaf(maf = maf, isTCGA = isTCGA, rdup = removeDuplicatedVariants, :
  missing required fields from MAF: Hugo_Symbol
> IKKpunctatelow <- read.maf(file.choose())
-Reading
-Validating
--Removed 137 duplicated variants
--Non MAF specific values in Variant_Classification column:
Multi_Hit
3UTR
inframe_indellstop_gained
inframe_indel
inframe_indelMissense_Mutation
--Non MAF specific values in Variant_Type column:
Complex
-Silent variants: 425
-Summarizing
-Processing clinical data
--Missing clinical data
-Finished in 22.0s elapsed (0.854s cpu)
> IKKpunctatehigh <- read.maf(file.choose())
-Reading
-Validating
--Removed 5 duplicated variants
--Non MAF specific values in Variant_Classification column:
Multi_Hit
--Non MAF specific values in Variant_Type column:
Complex
-Silent variants: 12
-Summarizing
-Processing clinical data
--Missing clinical data
-Finished in 6.338s elapsed (0.352s cpu)
> oncoplot(maf=IKKpunctatelow,top=10)

```

```

> oncoplot(maf=IKKpunctatehigh,top=10)
> OncogenicPathways(maf= IKKpunctatelow)
  Pathway N_n_affected_genes fraction_affected Mutated_samples Fraction_mutated_samples
1:  NRF2 3      1  0.33333333      3      0.02040816
2:  Hippo 38     2  0.05263158     12     0.08163265
3:  MYC 13      2  0.15384615      3      0.02040816
4:  TGF-Beta 7     2  0.28571429     38     0.25850340
5:  WNT 68      4  0.05882353     129    0.87755102
6:  TP53 6       4  0.66666667    112    0.76190476
7:  NOTCH 71     7  0.09859155     72     0.48979592
8:  Cell_Cycle 15    8  0.53333333     20     0.13605442
9:  PI3K 29     11  0.37931034     63     0.42857143
10: RTK-RAS 85    28  0.32941176    124    0.84353741
> OncogenicPathways(maf= IKKpunctatehigh)
  Pathway N_n_affected_genes fraction_affected Mutated_samples Fraction_mutated_samples
1: Cell_Cycle 15    1  0.06666667      1      0.09090909
2:  NRF2 3      1  0.33333333      1      0.09090909
3:  WNT 68      2  0.02941176      8      0.72727273
4:  TGF-Beta 7     2  0.28571429      3      0.27272727
5:  NOTCH 71     3  0.04225352      3      0.27272727
6:  TP53 6       3  0.50000000      9      0.81818182
7:  PI3K 29     4  0.13793103      5      0.45454545
8:  RTK-RAS 85    11  0.12941176     11     1.00000000
> IKKpunctatelow.vs.IKKpunctatehigh <- mafCompare(m1 = IKKpunctatelow, m2 = IKKpunctatehigh, m1Name = 'Low', m2Name = 'High', minMut = 5)
> print(IKKpunctatelow.vs.IKKpunctatehigh)
$results
  Hugo_Symbol Low High  pval  or  ci.up  ci.low adjPval
1:  PDGFRA 6 3 0.01693304 0.1168469 0.8512627 0.01983251 1
2:  KRAS 66 9 0.02602932 0.1828151 0.9264554 0.01861796 1
3:  RET 5 2 0.07655128 0.1621296 1.9238916 0.02227786 1
4:  PIK3R1 7 2 0.12135753 0.2286777 2.5660751 0.03550370 1
5:  ROS1 8 2 0.14588678 0.2625954 2.8938770 0.04231794 1
6:  SMAD4 19 3 0.18333364 0.3988933 2.5354896 0.08560004 1
7:  TP53 89 9 0.20833360 0.3429801 1.7419962 0.03485732 1
8:  RNF43 26 0 0.21329377  Inf  Inf 0.50028993 1
9:  BRAF 25 0 0.21481915  Inf  Inf 0.47609327 1
10: AMER1 12 2 0.25246992 0.4031851 4.2530257 0.07060773 1
11: NOTCH3 19 0 0.36280436  Inf  Inf 0.33875949 1
12: CHEK2 6 1 0.40272353 0.4287501 21.5081086 0.04447555 1
13: MEN1 6 1 0.40272353 0.4287501 21.5081086 0.04447555 1
14: CTCF 7 1 0.44623374 0.5028682 24.7613140 0.05468634 1
15: PBRM1 7 1 0.44623374 0.5028682 24.7613140 0.05468634 1
16: PIK3CA 28 3 0.45224205 0.6295333 3.9164291 0.13934373 1
17: GATA3 8 1 0.48684326 0.5780276 28.0613262 0.06507063 1
18: IDH1 8 1 0.48684326 0.5780276 28.0613262 0.06507063 1
19: DICER1 9 1 0.52472732 0.6542535 31.4091629 0.07561369 1
20: ARID2 10 1 0.56005164 0.7315656 34.8058715 0.08632258 1
21: PTCH1 10 1 0.56005164 0.7315656 34.8058715 0.08632258 1
22: TAF1B 10 1 0.56005164 0.7315656 34.8058715 0.08632258 1
23: NF1 11 1 0.59297295 0.8099986 38.2525304 0.09719398 1
24: NRAS 11 1 0.59297295 0.8099986 38.2525304 0.09719398 1
25: POLE 11 1 0.59297295 0.8099986 38.2525304 0.09719398 1
26: SLC23A2 11 1 0.59297295 0.8099986 38.2525304 0.09719398 1
27: TMBIM4 11 1 0.59297295 0.8099986 38.2525304 0.09719398 1
28: BLM 14 0 0.60027905  Inf  Inf 0.23362621 1
29: KMT2A 14 0 0.60027905  Inf  Inf 0.23362621 1
30: AIM2 13 0 0.60133652  Inf  Inf 0.21353998 1
31: EP300 13 0 0.60133652  Inf  Inf 0.21353998 1
32: POLQ 13 0 0.60133652  Inf  Inf 0.21353998 1
33: CREBBP 15 0 0.60146870  Inf  Inf 0.25402248 1
34: ERBB4 16 0 0.60462722  Inf  Inf 0.27472624 1

```



|     |         |     |   |            |           |            |            |   |
|-----|---------|-----|---|------------|-----------|------------|------------|---|
| 35: | NOTCH2  | 16  | 0 | 0.60462722 | Inf       | Inf        | 0.27472624 | 1 |
| 36: | MSH6    | 17  | 0 | 0.60949977 | Inf       | Inf        | 0.29574428 | 1 |
| 37: | FBXW7   | 21  | 2 | 0.66303229 | 0.7514911 | 7.6238349  | 0.14073376 | 1 |
| 38: | MSH2    | 21  | 2 | 0.66303229 | 0.7514911 | 7.6238349  | 0.14073376 | 1 |
| 39: | ATM     | 25  | 1 | 0.69324948 | 2.0416638 | 92.4064544 | 0.26796002 | 1 |
| 40: | AR      | 40  | 2 | 0.72867399 | 1.6773149 | 16.6166388 | 0.32669716 | 1 |
| 41: | ALK     | 20  | 1 | 1.00000000 | 1.5708943 | 71.6962555 | 0.20272038 | 1 |
| 42: | ARID1B  | 10  | 0 | 1.00000000 | Inf       | Inf        | 0.15502690 | 1 |
| 43: | ATR     | 20  | 1 | 1.00000000 | 1.5708943 | 71.6962555 | 0.20272038 | 1 |
| 44: | CDK12   | 10  | 0 | 1.00000000 | Inf       | Inf        | 0.15502690 | 1 |
| 45: | MAP3K1  | 10  | 0 | 1.00000000 | Inf       | Inf        | 0.15502690 | 1 |
| 46: | PTEN    | 13  | 1 | 1.00000000 | 0.9703327 | 45.3001732 | 0.11942897 | 1 |
| 47: | RAD50   | 13  | 1 | 1.00000000 | 0.9703327 | 45.3001732 | 0.11942897 | 1 |
| 48: | SETD2   | 10  | 0 | 1.00000000 | Inf       | Inf        | 0.15502690 | 1 |
| 49: | SF3B1   | 10  | 0 | 1.00000000 | Inf       | Inf        | 0.15502690 | 1 |
| 50: | SMARCA4 | 10  | 0 | 1.00000000 | Inf       | Inf        | 0.15502690 | 1 |
| 51: | SMO     | 10  | 0 | 1.00000000 | Inf       | Inf        | 0.15502690 | 1 |
| 52: | TSC2    | 10  | 0 | 1.00000000 | Inf       | Inf        | 0.15502690 | 1 |
| 53: | TTK     | 18  | 1 | 1.00000000 | 1.3927159 | 63.8606786 | 0.17801415 | 1 |
| 54: | APC     | 102 | 8 | 1.00000000 | 0.8508612 | 3.7578728  | 0.13899153 | 1 |
| 55: | ARID1A  | 27  | 2 | 1.00000000 | 1.0124222 | 10.1566173 | 0.19323340 | 1 |
| 56: | ASTE1   | 14  | 1 | 1.00000000 | 1.0523028 | 48.9034785 | 0.13078601 | 1 |
| 57: | ASXL1   | 22  | 1 | 1.00000000 | 1.7547234 | 79.7819907 | 0.22819906 | 1 |
| 58: | ATRX    | 9   | 0 | 1.00000000 | Inf       | Inf        | 0.13609689 | 1 |
| 59: | B2M     | 9   | 0 | 1.00000000 | Inf       | Inf        | 0.13609689 | 1 |
| 60: | BRC1A   | 12  | 1 | 1.00000000 | 0.8896011 | 41.7502498 | 0.10822889 | 1 |
| 61: | BRC2A   | 19  | 1 | 1.00000000 | 1.4811152 | 67.7479275 | 0.19027863 | 1 |
| 62: | CASP5   | 5   | 0 | 1.00000000 | Inf       | Inf        | 0.06328963 | 1 |
| 63: | CCDC150 | 7   | 0 | 1.00000000 | Inf       | Inf        | 0.09909482 | 1 |
| 64: | CIITA   | 9   | 0 | 1.00000000 | Inf       | Inf        | 0.13609689 | 1 |
| 65: | COBLL1  | 9   | 0 | 1.00000000 | Inf       | Inf        | 0.13609689 | 1 |
| 66: | CTNNA1  | 12  | 0 | 1.00000000 | Inf       | Inf        | 0.19374529 | 1 |
| 67: | DNMT3A  | 6   | 0 | 1.00000000 | Inf       | Inf        | 0.08103391 | 1 |
| 68: | ERBB2   | 7   | 0 | 1.00000000 | Inf       | Inf        | 0.09909482 | 1 |
| 69: | ERBB3   | 12  | 1 | 1.00000000 | 0.8896011 | 41.7502498 | 0.10822889 | 1 |
| 70: | FGFR1   | 6   | 0 | 1.00000000 | Inf       | Inf        | 0.08103391 | 1 |
| 71: | FGFR2   | 7   | 0 | 1.00000000 | Inf       | Inf        | 0.09909482 | 1 |
| 72: | FGFR3   | 6   | 0 | 1.00000000 | Inf       | Inf        | 0.08103391 | 1 |
| 73: | FGFR4   | 7   | 0 | 1.00000000 | Inf       | Inf        | 0.09909482 | 1 |
| 74: | GNA11   | 6   | 0 | 1.00000000 | Inf       | Inf        | 0.08103391 | 1 |
| 75: | GNAS    | 12  | 0 | 1.00000000 | Inf       | Inf        | 0.19374529 | 1 |
| 76: | HGF     | 5   | 0 | 1.00000000 | Inf       | Inf        | 0.06328963 | 1 |
| 77: | IDH2    | 6   | 0 | 1.00000000 | Inf       | Inf        | 0.08103391 | 1 |
| 78: | JAK1    | 6   | 0 | 1.00000000 | Inf       | Inf        | 0.08103391 | 1 |
| 79: | MAP2K4  | 6   | 0 | 1.00000000 | Inf       | Inf        | 0.08103391 | 1 |
| 80: | MLH1    | 5   | 0 | 1.00000000 | Inf       | Inf        | 0.06328963 | 1 |
| 81: | MTOR    | 11  | 0 | 1.00000000 | Inf       | Inf        | 0.17424224 | 1 |
| 82: | NBN     | 6   | 0 | 1.00000000 | Inf       | Inf        | 0.08103391 | 1 |
| 83: | NOTCH1  | 21  | 1 | 1.00000000 | 1.6620859 | 75.7071114 | 0.21535957 | 1 |
| 84: | NOTCH4  | 19  | 1 | 1.00000000 | 1.4811152 | 67.7479275 | 0.19027863 | 1 |
| 85: | NTRK1   | 6   | 0 | 1.00000000 | Inf       | Inf        | 0.08103391 | 1 |
| 86: | PALB2   | 12  | 0 | 1.00000000 | Inf       | Inf        | 0.19374529 | 1 |
| 87: | PIK3CB  | 5   | 0 | 1.00000000 | Inf       | Inf        | 0.06328963 | 1 |
| 88: | RB1     | 5   | 0 | 1.00000000 | Inf       | Inf        | 0.06328963 | 1 |
| 89: | RPL22   | 23  | 1 | 1.00000000 | 1.8488417 | 83.9224367 | 0.24124265 | 1 |
| 90: | RUNX1   | 8   | 0 | 1.00000000 | Inf       | Inf        | 0.11745199 | 1 |
| 91: | TEAD2   | 11  | 0 | 1.00000000 | Inf       | Inf        | 0.17424224 | 1 |
| 92: | TGFBR2  | 21  | 1 | 1.00000000 | 1.6620859 | 75.7071114 | 0.21535957 | 1 |

Hugo\_Symbol Low High pval or ci.up ci.low adjPval

\$\$SampleSummary

Cohort SampleSize

1: Low 147  
2: High 11

```
> forestPlot(mafCompareRes = IKKpunctatelow.vs.IKKpunctatehigh, pVal = 0.05, color = c('royalblue', 'maroon'), geneFontSize = 0.8)
> genes = c("PDGFRA", "KRAS", "RET", "PIK3R1", "ROS1", "SMAD4", "TP53", "RNF43", "BRAF", "AMER1")
> coBarplot(m1 = IKKpunctatelow, m2 = IKKpunctatehigh, m1Name = 'Low', m2Name = 'High', genes = genes)
> IKKall <- read.maf(file.choose())
-Reading
-Validating
--Removed 199 duplicated variants
--Non MAF specific values in Variant_Classification column:
Multi_Hit
3UTR
inframe_indelstop_gained
inframe_indel
inframe_indelMissense_Mutation

--Non MAF specific values in Variant_Type column:
Complex
-Silent variants: 613
-Summarizing
-Processing clinical data
--Missing clinical data
-Finished in 14.9s elapsed (0.735s cpu)
> plotmafSummary(maf = IKKall, rmOutlier = TRUE, addStat = 'median', dashboard = TRUE, titvRaw = FALSE)
> plotVaf(maf = IKKall, vafCol = 'VAF', top = 10)
```

Supplementary Table 4. Univariate and multivariate analysis in patients undergoing surgery for colorectal cancer

| <b>Clinicopathological characteristics</b>    | <b>Univariate HR (95% CI)</b> | <b><i>P</i></b> | <b>Multivariate analysis</b> | <b><i>p</i></b>  |
|-----------------------------------------------|-------------------------------|-----------------|------------------------------|------------------|
| <b>Age (&lt;65/&gt;65)</b>                    | 1.25 (0.80 – 1.31)            | 0.859           |                              |                  |
| <b>Sex (Female/Male)</b>                      | 1.12 (0.89 – 1.42)            | 0.348           |                              |                  |
| <b>Type of surgery (Elective/Emergency)</b>   | 1.74 (1.33 – 2.28)            | <0.001          | 1.69 (1.23 – 2.33)           | <b>0.002</b>     |
| <b>Tumour location (Right/Left/Rectum)</b>    | 0.74 (0.88 – 1.20)            | 0.725           |                              |                  |
| <b>Tumour Characteristics</b>                 |                               |                 |                              |                  |
| <b>TNM stage (I/II/III)</b>                   | 2.63 (2.15 – 3.23)            | <0.001          | 2.42 (1.90 – 3.08)           | <b>&lt;0.001</b> |
| <b>Tumour differentiation (Mod-well/poor)</b> | 1.69 (1.22 – 2.35)            | <0.001          |                              |                  |
| <b>Venous invasion (No/Yes)</b>               | 1.67 (1.31 – 2.13)            | <0.001          | 1.51 (1.12 – 2.02)           | <b>0.007</b>     |
| <b>Margin involvement (No/Yes)</b>            | 3.73 (1.71 – 8.14)            | <0.001          | 2.26 (1.43 – 3.57)           | <b>0.001</b>     |
| <b>Necrosis (Absent/Present)</b>              | 1.13 (0.67 – 1.91)            | 0.088           |                              |                  |
| <b>Proliferation (High/Low)</b>               | 0.79 (0.48 – 1.29)            | <0.001          |                              |                  |
| <b>MMR status (Proficient/Deficient)</b>      | 1.10 (0.55 – 2.16)            | 0.176           |                              |                  |
| <b>Tumour microenvironment</b>                |                               |                 |                              |                  |
| <b>Klintrup-Mäkinen grade (Weak/Strong)</b>   | 0.51 (0.28 – 0.93)            | <0.001          | 0.47 (0.32-0.68)             | <b>&lt;0.001</b> |
| <b>Tumour stroma percentage (Low/High)</b>    | 2.01 (1.22 – 3.54)            | <0.001          | 1.58 (1.16-2.14)             | <b>0.005</b>     |

|                                                       |                    |        |                   |              |
|-------------------------------------------------------|--------------------|--------|-------------------|--------------|
| <b>Adjuvant therapy (No/Yes)</b>                      | 1.05 (0.63 – 1.74) | 0.994  |                   |              |
| <b>Cytoplasmic IKK-<math>\alpha</math> (Low/High)</b> | 1.56 (0.87 – 2.78) | 0.240  |                   |              |
| <b>Punctate IKK-<math>\alpha</math> (Low/High)</b>    | 2.22 (1.14 – 4.30) | <0.001 | 1.97 (1.26 –3.08) | <b>0.006</b> |

Supplementary Figure 1. Altered CHUK gene signature and survival in patients from the TCGA panCancer atlas colorectal cohort

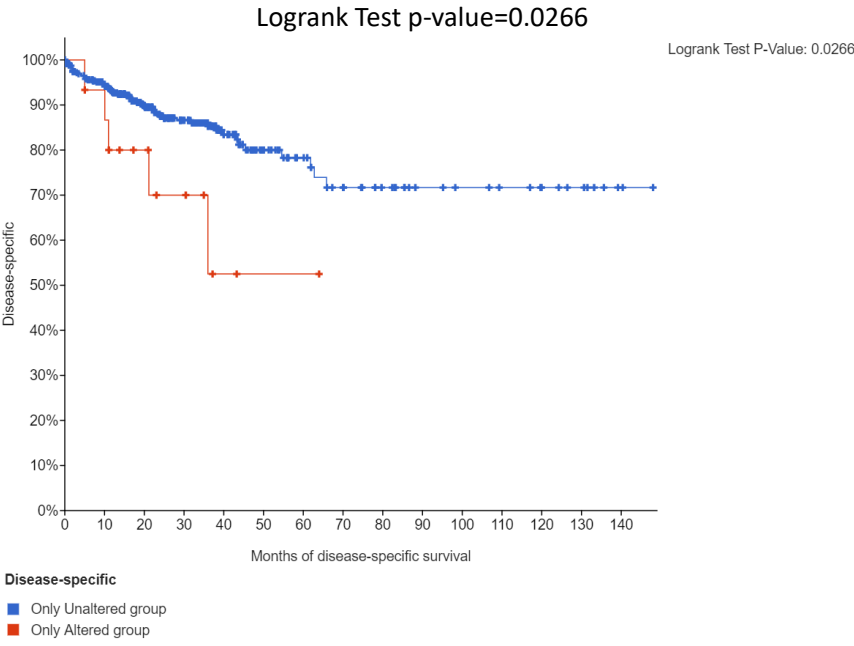

## Supplementary Figure 2. Mutational cohort characteristics

A

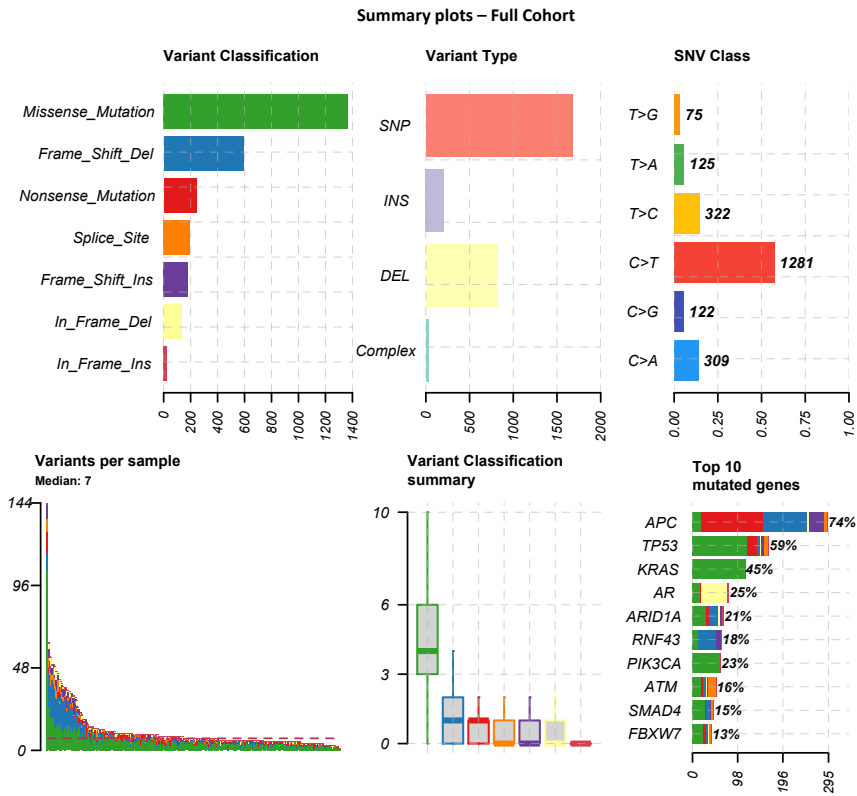

B

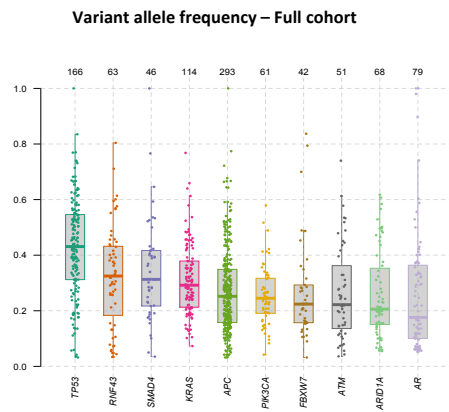

C

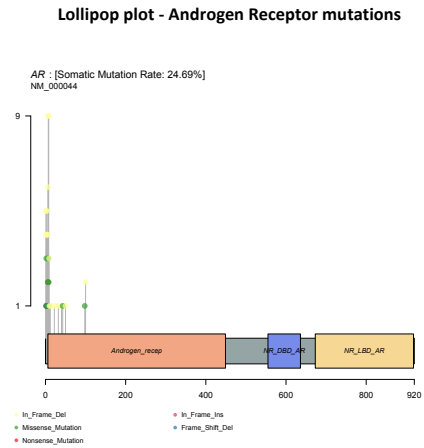

Supplementary Figure 3. Mutations in oncogenic pathways in low vs high cytoplasmic and low vs. high punctate IKK $\alpha$

A

Mutations in oncogenic pathways -Low Cytoplasmic IKK $\alpha$

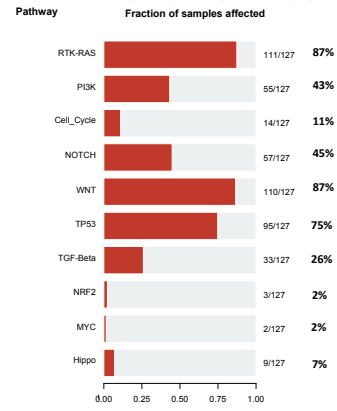

Mutations in oncogenic pathways -High Cytoplasmic IKK $\alpha$

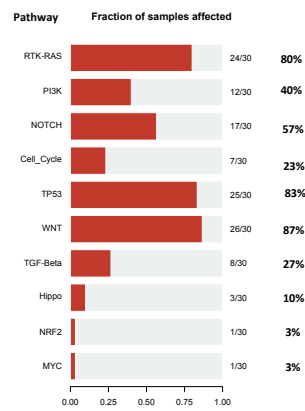

B

Mutations in oncogenic pathways -Low punctate IKK $\alpha$

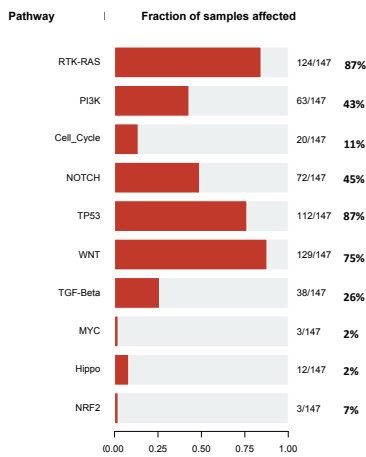

Mutations in oncogenic pathways -High punctate IKK $\alpha$

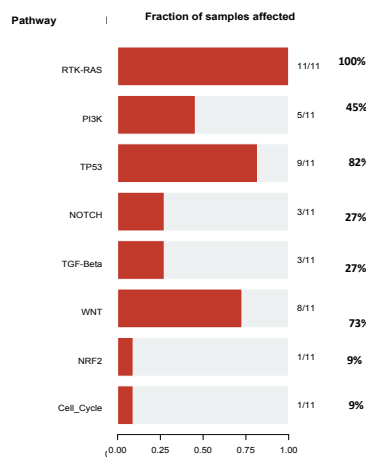

Supplement: 41416_2022_1729_MOESM2_ESM.pdf [file 41416_2022_1729_MOESM2_ESM.pdf]
